# Supplementary material
Source: HighWire-hosted journal article supplement (http://www.qdcxjkg.com/highwire/filestream/113781/field_highwire_adjunct_files/0/Supplementary_Tables.pdf)
Supplement: Supplementary_Tables.pdf [file Supplementary_Tables.pdf]

## Supplementary Tables

### **Table A.**

Table accessible from Department of Health document Gateway number: 12368 at:

[http://www.dh.gov.uk/en/Publicationsandstatistics/Publications/PublicationsPolicyAndGuidance/DH\\_106495](http://www.dh.gov.uk/en/Publicationsandstatistics/Publications/PublicationsPolicyAndGuidance/DH_106495)

The community assessment tools are part of a clinical package of care, which includes pathways that provide extra safety measures for people who are moderately unwell, but cannot be admitted to hospital at the time of triage.

These tools and pathways are for use only when high healthcare demand leads to the need for strict hospital admission triage in affected areas. They should not be used when emergency departments and acute admission units are working with their usual establishment of trained staff, and can operate their usual decision pathways, including providing hospital beds for those requiring admission.

**Table B: Comparison of clinical features on hospital admission in children (<16 years) with asthma and non-asthma (n=480)**

| Outcome variable                                     | Asthma cases<br>n=71 (14.8%) | Non-asthmatics<br>n=409(85.2%) | Unadjusted OR<br>(95% CI) | P value          |
|------------------------------------------------------|------------------------------|--------------------------------|---------------------------|------------------|
| Triage criteria A:<br>severe respiratory<br>distress | 38 (53.5%)                   | 309 (75.6%)                    | 1.00                      | <b>&lt;0.001</b> |
| No                                                   | 33 (46.5%)                   | 100 (24.5%)                    | <b>2.68 (1.60-4.50)</b>   |                  |
| Triage criteria B:<br>increased respiratory<br>rate  | 41 (57.8%)                   | 256 (62.6%)                    | 1.00                      | 0.438            |
| No                                                   | 30 (42.3%)                   | 153 (37.4%)                    | 1.22 (0.73-2.04)          |                  |
| Triage criteria C:<br>oxygen saturation<br>≤92%      | 42 (59.2%)                   | 299 (73.1%)                    | 1.00                      | <b>0.018</b>     |
| No                                                   | 29 (40.9%)                   | 110 (26.9%)                    | <b>1.88 (1.11-3.16)</b>   |                  |
| Triage criteria D:<br>respiratory exhaustion         |                              |                                |                           |                  |
| No                                                   | 71 (100.0%)                  | 408 (99.8%)                    | 1.00                      |                  |
| Yes                                                  | 0 (0.0%)                     | 1 (0.2%)                       | -*                        | -                |
| Triage criteria E:<br>Severe clinical<br>dehydration |                              |                                |                           |                  |
| No                                                   | 71 (100.0%)                  | 403 (98.5%)                    | 1.00                      |                  |
| Yes                                                  | 0 (0.0%)                     | 6 (1.5%)                       | -*                        | -                |

| Outcome variable                             | Asthma cases<br>n=71 (14.8%) | Non-asthmatics<br>n=409(85.2%) | Unadjusted OR<br>(95% CI) | P value      |
|----------------------------------------------|------------------------------|--------------------------------|---------------------------|--------------|
| Triage criteria F:<br>altered consciousness  |                              |                                |                           |              |
| No                                           | 63 (88.7%)                   | 364 (89.0%)                    | 1.00                      | 0.948        |
| Yes                                          | 8 (11.3%)                    | 45 (11.0%)                     | 1.03 (0.46-2.28)          |              |
| Triage criteria G: other<br>clinical concern |                              |                                |                           |              |
| No                                           | 65 (91.6%)                   | 374 (91.4%)                    | 1.00                      | 0.976        |
| Yes                                          | 6 (8.5%)                     | 35 (8.6%)                      | 0.99 (0.40-2.44)          |              |
| Dyspnoea                                     |                              |                                |                           |              |
| No                                           | 43 (60.6%)                   | 326 (79.7%)                    | 1.00                      | <b>0.001</b> |
| Yes                                          | 28 (39.4%)                   | 83 (20.3%)                     | <b>2.56 (1.50-4.36)</b>   |              |
| Required supplemental<br>oxygen on admission |                              |                                |                           |              |
| No                                           | 44 (62.0%)                   | 327 (80.0%)                    | 1.00                      | <b>0.001</b> |
| Yes                                          | 27 (38.0%)                   | 82 (20.0%)                     | <b>2.45 (1.43-4.19)</b>   |              |

**Table C: Comparison of clinical features on hospital admission in adults (>16 years) with asthma and non-asthma (n=1040)**

| Outcome variable                                  | Asthma cases<br>n=314<br>(30.2%) | Non-asthmatics<br>n=726<br>(69.8%) | Unadjusted OR<br>(95% CI) | P value          |
|---------------------------------------------------|----------------------------------|------------------------------------|---------------------------|------------------|
| Triage criteria A: severe<br>respiratory distress |                                  |                                    |                           |                  |
| No                                                | 84 (26.8%)                       | 427 (58.5%)                        | 1.00                      | <b>&lt;0.001</b> |
| Yes                                               | 230 (73.3%)                      | 299 (41.2%)                        | <b>3.91 (2.93-5.23)</b>   |                  |

| <b>Outcome variable</b>                         | <b>Asthma cases<br/>n=314<br/>(30.2%)</b> | <b>Non-<br/>asthmatics<br/>n=726<br/>(69.8%)</b> | <b>Unadjusted<br/>OR<br/>(95% CI)</b> | <b>P value</b> |
|-------------------------------------------------|-------------------------------------------|--------------------------------------------------|---------------------------------------|----------------|
| Triage criteria B: increased respiratory rate   |                                           |                                                  |                                       |                |
| No                                              | 253 (80.6%)                               | 538 (74.1%)                                      | 1.00                                  |                |
| Yes                                             | 61 (19.4%)                                | 188 (25.9%)                                      | <b>0.69 (0.50-0.96)</b>               | <b>0.025</b>   |
| Triage criteria C: oxygen saturation $\leq$ 92% |                                           |                                                  |                                       |                |
| No                                              | 170 (54.1%)                               | 458 (63.1%)                                      | 1.00                                  |                |
| Yes                                             | 144 (45.9%)                               | 268 (36.9%)                                      | <b>1.45 (1.11-1.89)</b>               | <b>0.007</b>   |
| Triage criteria D: respiratory exhaustion       |                                           |                                                  |                                       |                |
| No                                              | 302 (96.2%)                               | 715 (98.5%)                                      | 1.00                                  |                |
| Yes                                             | 12 (3.8%)                                 | 11 (1.5%)                                        | <b>2.58 (1.13-5.92)</b>               | <b>0.025</b>   |
| Triage criteria E: Severe clinical dehydration  |                                           |                                                  |                                       |                |
| No                                              | 255 (81.2%)                               | 609 (83.9%)                                      | 1.00                                  |                |
| Yes                                             | 59 (18.8%)                                | 117 (16.1%)                                      | 1.20 (0.85-1.70)                      | 0.291          |
| Triage criteria F: altered consciousness        |                                           |                                                  |                                       |                |
| No                                              | 305 (97.1%)                               | 683 (94.1%)                                      | 1.00                                  |                |
| Yes                                             | 9 (2.9%)                                  | 43 (5.9%)                                        | <b>0.47 (0.23-0.97)</b>               | <b>0.042</b>   |
| Triage criteria G: other clinical concern       |                                           |                                                  |                                       |                |
| No                                              | 282 (89.8%)                               | 658 (90.6%)                                      | 1.00                                  |                |
| Yes                                             | 32 (10.2%)                                | 68 (9.4%)                                        | 1.10 (0.71-                           | 0.679          |

| Outcome variable                          | Asthma cases<br>n=314<br>(30.2%) | Non-<br>asthmatics<br>n=726<br>(69.8%) | Unadjusted<br>OR<br>(95% CI) | P value          |
|-------------------------------------------|----------------------------------|----------------------------------------|------------------------------|------------------|
|                                           |                                  |                                        | 1.71)                        |                  |
| Dyspnoea                                  |                                  |                                        |                              |                  |
| No                                        | 117 (37.3%)                      | 459 (63.2%)                            | 1.00                         | <b>&lt;0.001</b> |
| Yes                                       | 197 (62.7%)                      | 267 (36.8%)                            | <b>2.89 (2.20-3.81)</b>      |                  |
| Required supplemental oxygen on admission |                                  |                                        |                              |                  |
| No                                        | 201 (64.0%)                      | 513 (70.7%)                            | 1.00                         | <b>0.034</b>     |
| Yes                                       | 113 (36.0%)                      | 213 (29.3%)                            | <b>1.35 (1.02-1.79)</b>      |                  |

**Table D: Effect on the observed association between asthma and severe outcomes on adjustment for the covariates that were independently associated with both exposure (asthma) and severe outcomes**

| Covariate adjusted for                                           | Adjusted OR<br>(95% CI)       | p value |
|------------------------------------------------------------------|-------------------------------|---------|
| Unadjusted OR                                                    | 0.51 (0.36-0.72)              | <0.001  |
| Triage criteria A: severe respiratory distress                   | 0.34 (0.24-0.49)              | <0.001  |
| Triage criteria B: increased respiratory rate                    | 0.53 (0.37-0.75)              | <0.001  |
| Triage criteria C: oxygen saturation $\leq$ 92%                  | 0.37 (0.26-0.54)              | <0.001  |
| Triage criteria D: respiratory exhaustion                        | 0.46 (0.32-0.66)              | <0.001  |
| Triage criteria E: severe clinical dehydration or clinical shock | 0.46 (0.32-0.66)              | <0.001  |
| Triage criteria F: altered consciousness                         | 0.54 (0.38-0.77)              | 0.001   |
| Dyspnoea                                                         | 0.38 (0.27-0.55)              | <0.001  |
| Admission $\leq$ 4 days symptom onset                            | 0.64 (0.43-0.95) <sup>†</sup> | 0.029   |
| Pre-admission inhaled corticosteroids                            | 0.63 (0.42-0.94) <sup>†</sup> | 0.024   |
| Required supplemental oxygen on admission                        | 0.37 (0.26-0.54)              | <0.001  |
| In-hospital antibiotics                                          | 0.49 (0.35-0.70)              | <0.001  |
| In-hospital oral/IV corticosteroids                              | 0.32 (0.22-0.48)              | <0.001  |

† Crude OR changed by  $\geq 10\%$  towards 1
